# Supplementary material
Source: publisher figshare collection journal article supplement (https://tandf.figshare.com/ndownloader/files/21599091)
Supplement: Supplementary file 1 [file 21599091]

Table 4. Survey: Role of networks in SDGs implementation

| **Sections** | **Questions** |
| --- | --- |
| 1. **RCEs and their involvement with SDGs,** | 1. Where is your RCE located?  - Africa and Middle East - Asia - Pacific - Europe - The Americas  1. What is your affiliated organization?  - Educational Institution - Local Government - Central government - Business - Non-profit - Other  1. Thematic focus of your RCE belongs to? (Subdivision of the Goals according to the UNSSC list of Goals in questions 6)  - MDG’s Unfinished Business (Goals 1-5) - New Areas; Water, Energy, Economic Growth, Industry, Inequality, Urbanization (Goals 6-11) - Green Agenda (Goals 12-15) - Governance (Goal 16) - Partnership (Goal 17)  1. Based on your opinion to what extend is your RCE involved with SDGs?   0 (Not involved) -1-2-3-4-5 (Strongly involved)   1. Do you deal with?  - The 2030 Agenda For Sustainable Development, as a whole - Several Goals - Only Goal 4. Ensure inclusive and equitable quality education - Other  1. Please select which specific Goals  - [GOAL 1: No Poverty](https://www.un.org/development/desa/disabilities/?page_id=6226&preview=true) - [GOAL 2: Zero Hunger](http://www.un.org/development/desa/disabilities/envision2030-goal2.html) - [GOAL 3: Good Health and Well-being](http://www.un.org/development/desa/disabilities/envision2030-goal3.html) - [GOAL 4: Quality Education](http://www.un.org/development/desa/disabilities/envision2030-goal4.html) - [GOAL 5: Gender Equality](http://www.un.org/development/desa/disabilities/envision2030-goal5.html) - [GOAL 6: Clean Water and Sanitation](http://www.un.org/development/desa/disabilities/envision2030-goal6.html) - [GOAL 7: Affordable and Clean Energy](http://www.un.org/development/desa/disabilities/envision2030-goal7.html) - [GOAL 8: Decent Work and Economic Growth](http://www.un.org/development/desa/disabilities/envision2030-goal8.html) - [GOAL 9: Industry, Innovation and Infrastructure](http://www.un.org/development/desa/disabilities/envision2030-goal9.html) - [GOAL 10: Reduced Inequality](http://www.un.org/development/desa/disabilities/envision2030-goal10.html) - [GOAL 11: Sustainable Cities and Communities](http://www.un.org/development/desa/disabilities/envision2030-goal11.html) - [GOAL 12: Responsible Consumption and Production](http://www.un.org/development/desa/disabilities/envision2030-goal12.html) - [GOAL 13: Climate Action](http://www.un.org/development/desa/disabilities/envision2030-goal13.html) - [GOAL 14: Life Below Water](http://www.un.org/development/desa/disabilities/envision2030-goal14.html) - [GOAL 15: Life on Land](http://www.un.org/development/desa/disabilities/envision2030-goal15.html) - [GOAL 16: Peace and Justice Strong Institutions](http://www.un.org/development/desa/disabilities/envision2030-goal16.html) - [GOAL 17: Partnerships to achieve the Goal](http://www.un.org/development/desa/disabilities/envision2030-goal17.html)  1. [Do you work with specific targets and indicators? There are 161 targets and 244 indicators approved (232, + 9 indicators repeat under 2 or 3 targets), classified into Tier I,II,III, on the basis of their level of methodological development and the availability of data at the global level. (if yes, please name from the lishttps://unstats.un.org/sdgs/indicators/indicators-list/](https://unstats.un.org/sdgs/indicators/indicators-list/)  - Yes - No  1. Please select which of SDG4 targets you work with? (7 outcome targets, 3 means of implementation)  - Target 4.1 - Target 4.2 - Target 4.3 - Target 4.4 - Target 4.5 - Target 4.6 - Target 4.7 - Target 4.a - Target 4.b - Target 4.c - None  1. Is your RCE involved in?  - Research for SDGs? - Development projects for SDGs? - Advertising/Campaigning for SDGs?  1. In how many projects or actions? (Please divide according to question 9 if possible) 2. With how many partners for each? (Please mention the type of partner organizations if possible) 3. What kind of collaboration?  - RCE is leading the process - Horizontal consortium or bilateral - Vertical, depending on funding organization  1. In the light of 2030 Agenda, will your RCE undertake changes as?  - Expand number of partners - Change Leadership forms - Change governance structure - Adopt your programme and strategies to include the SDGs - No Changes  1. Are your affiliated organization or partners organizations independently involved in SDGs?  - Yes - No - Maybe |
| **2) networks links within regions and countries** | 1. Is your RCE collaborating with other networks in your region, for the 2030 Agenda for Sustainable Development?  - Networks of the same type of organization (Ex. the networks of Educational institutions, universities or schools) - Multi-stakeholder Networks (ex. business, public institutions, civil society, communities, educational institutions etc) - Other  1. [Are you part of the national review process of your country? As part of its follow-up and review mechanisms, the 2030 Agenda for Sustainable Development encourages member states to "conduct regular and inclusive reviews of progress at the national and sub-national levels, which are country-led and country-driven" https://sustainabledevelopment.un.org/memberstates](https://sustainabledevelopment.un.org/memberstates)  - Yes - No - Maybe  1. In country level, do you contribute in?  - National committees created by your central government for SDGs - Committees created by Responsible Ministries for SDGs - Local government’s actions toward 2030 agenda - Monitoring and tracking of SDGs progress - Consultancy for SDGs to national/local gov. - Only for specific Goals of your focus. i.e SDG 4 - Other:  1. Have your National/Local Government, allocated accessible funds for SDGs?  - Yes - No - Maybe |
| **3) network links in the international context** | 1. Do you collaborate with international organizations or networks for SDGs? EX. Sustainable Development Solutions Network, Global Compact, European Sustainable Development Network, UNDP, SDGs Watch, European Union Institutions, etc  - Yes - No  1. Within the RCE global network, do you collaborate for SDGs with?  - Other RCE-s for SDGs implementation - RCE coordination Center and UNU - RCEs within continental groups  1. Do you think RCEs involvement with SDGs should be?  - Top down process (from international or national level) - Bottom up (from individuals, organizations, local networks) - Focus oriented (only when intersected with your own thematic focus) |
| **4) Barriers challenges and opportunities.** | 1. Your involvement with SDGs is compromised by?  - Lack of funds - Lack of resources and staff - Lack of time - Not on your focus - Lack of autonomy from affiliated organization - Your Government is not active in 2030 Agenda - You are not involved in national/ local Gov actions - Other  1. The informality of the networks can influence SDGs by?  - Foster collaboration - Undermine the process - Difficult to measure and evidence the work - Weakens the visibility - Passive contribution - Other:  1. Do you find the 2030 Agenda for Sustainable Development?  - A method to measure impact of your network and organization - Ambiguous about targets and indicators - Difficult to measure and scale down - Very useful for your work - A continuation of your work for MDG on ESD  1. Please add other problems/barriers for your involvement with SDGs |

Table 5. The most influencing and influenced Targets (ranked according to the values of Targets Matrix in Figure 2) and respective selected Indicators in the context of the Regional Centres of Expertise on Education for Sustainable Development (RCEs).

| **Targets ( the most influencing)** | **Selected Indicators** |
| --- | --- |
| 17.14: Enhance policy coherence for sustainable development | 17.14.1: Number of countries with mechanisms in place to enhance policy coherence of sustainable development |
| 17.17: Encourage and promote effective public, public-private and civil society partnerships, building on the experience and resourcing strategies of partnerships Data, monitoring and accountability | 17.17.1:Amount of United States dollars committed to public-private and civil society partnerships |
| 17.16: Enhance the global partnership for sustainable development, complemented by multi-stakeholder partnerships that mobilize and share knowledge, expertise, technology and financial resources, to support the achievement of the sustainable development goals in all countries, in particular developing countries | 17.16.1Number of countries reporting progress in multi-stakeholder development effectiveness monitoring frameworks that support the achievement of the sustainable development goals |
| 13.3: Improve education, awareness-raising and human and institutional capacity on climate change mitigation, adaptation, impact reduction and early warning | 13.3.1: Number of countries that have integrated mitigation, adaptation, impact reduction and early warning into primary, secondary and tertiary curricula |
| 13.3.2: Number of countries that have communicated the strengthening of institutional, systemic and individual capacity-building to implement adaptation, mitigation and technology transfer, and development actions |
| 13.1: Strengthen resilience and adaptive capacity to climate-related hazards and natural disasters in all countries | 13.1.2: Number of countries that adopt and implement national disaster risk reduction strategies in line with the Sendai Framework for Disaster Risk Reduction 2015-2030 |
| 13.1.3: Proportion of local governments that adopt and implement local disaster risk reduction strategies in line with national disaster risk reduction strategies |
| 17.6: Enhance North-South, South-South and triangular regional and international cooperation on and access to science, technology and innovation and enhance knowledge-sharing on mutually agreed terms, including through improved coordination among existing mechanisms, in particular at the United Nations level, and through a global technology facilitation mechanism | 17.6.1: Number of science and/or technology cooperation agreements and programmes between countries, by type of cooperation |
| 12.8:By 2030, ensure that people everywhere have the relevant information and awareness for sustainable development and lifestyles in harmony with nature | 12.8.1: Extent to which (i) global citizenship education and (ii) education for sustainable development (including climate change education) are mainstreamed in (a) national education policies; (b) curricula; (c) teacher education; and (d) student assessment |
| 12.1: Implement the 10-Year Framework of Programmes on Sustainable Consumption and Production Patterns, all countries taking action, with developed countries taking the lead, taking into account the development and capabilities of developing countries | 12.1.1: Number of countries with sustainable consumption and production (SCP) national action plans or SCP mainstreamed as a priority or a target into national policies |
| 12.b: Develop and implement tools to monitor sustainable development impacts for sustainable tourism that creates jobs and promotes local culture and products | 12.b.1: Number of sustainable tourism strategies or policies and implemented action plans with agreed monitoring and evaluation tools |
| 11.6: By 2030, reduce the adverse per capita environmental impact of cities, including by paying special attention to air quality and municipal and other waste management | 11.6.1: Proportion of urban solid waste regularly collected and with adequate final discharge out of total urban solid waste generated, by cities |
| 15.c: Enhance global support for efforts to combat poaching and trafficking of protected species, including by increasing the capacity of local communities to pursue sustainable livelihood opportunities | 15.c.1: Proportion of traded wildlife that was poached or illicitly trafficked (15.7.1) |
| 11.3: By 2030, enhance inclusive and sustainable urbanization and capacity for participatory, integrated and sustainable human settlement planning and management in all countries | 11.3.1: Ratio of land consumption rate to population growth rate |
| 11.3.2:Proportion of cities with a direct participation structure of civil society in urban planning and management that operate regularly and democratically |
| 7.a: By 2030, enhance international cooperation to facilitate access to clean energy research and technology, including renewable energy, energy efficiency and advanced and cleaner fossil-fuel technology, and promote investment in energy infrastructure and clean energy technology | 7.a.1: International financial flows to developing countries in support of clean energy research and development and renewable energy production, including in hybrid systems |
| 12.6: Encourage companies, especially large and transnational companies, to adopt sustainable practices and to integrate sustainability information into their reporting cycle | 12.6.1: Number of companies publishing sustainability reports |
| **Targets (the most Influenced)** | **Selected Indicators** |
| 4.7: Education for sustainable development and global citizenship | 4.7.1: Extent to which (i) global citizenship education and (ii) education for sustainable development, including gender equality and human rights, are mainstreamed at all levels in: (a) national education policies; (b) curricula; (c) teacher education; and (d) student assessment | |
| 3.d: Strengthen the capacity of all countries, in particular developing countries, for early warning, risk reduction and management of national and global health risks | 3.d.1: International Health Regulations (IHR) capacity and health emergency preparedness | |
| 17.14: Enhance policy coherence for sustainable development | 17.4.1Number of countries with mechanisms in place to enhance policy coherence of sustainable development | |
| 12.8:By 2030, ensure that people everywhere have the relevant information and awareness for sustainable development and lifestyles in harmony with nature | 12.8.1: Extent to which (i) global citizenship education and (ii) education for sustainable development (including climate change education) are mainstreamed in (a) national education policies; (b) curricula; (c) teacher education; and (d) student assessment | |
| 2.4: By 2030, ensure sustainable food production systems and implement resilient agricultural practices that increase productivity and production, that help maintain ecosystems, that strengthen capacity for adaptation to climate change, extreme weather, drought, flooding and other disasters and that progressively improve land and soil quality | 2.4.1: Proportion of agricultural area under productive and sustainable agriculture | |
| 13.3:Improve education, awareness-raising and human and institutional capacity on climate change mitigation, adaptation, impact reduction and early warning | 13.3.1: Number of countries that have integrated mitigation, adaptation, impact reduction and early warning into primary, secondary and tertiary curricula | |
| 13.3.2: Number of countries that have communicated the strengthening of institutional, systemic and individual capacity-building to implement adaptation, mitigation and technology transfer, and development actions | |
| 15.5: Take urgent and significant action to reduce the degradation of natural habitats, halt the loss of biodiversity and, by 2020, protect and prevent the extinction of threatened species | 15.5.1: Red List Index | |
| 4.3: By 2030, ensure equal access for all women and men to affordable and quality technical, vocational and tertiary education, including university | 4.3.1: Participation rate of youth and adults in formal and non-formal education and training in the previous 12 months, by sex | |
| 6.b: Support and strengthen the participation of local communities in improving water and sanitation management | 6.b.1: Proportion of local administrative units with established and operational policies and procedures for participation of local communities in water and sanitation management | |
| 6.6: By 2020, protect and restore water-related ecosystems, including mountains, forests, wetlands, rivers, aquifers and lakes | 6.6.1:Change in the extent of water-related ecosystems over time | |
| 11.6: By 2030, reduce the adverse per capita environmental impact of cities, including by paying special attention to air quality and municipal and other waste management | 11.6.1: Proportion of urban solid waste regularly collected and with adequate final discharge out of total urban solid waste generated, by cities | |
| 11.4: Strengthen efforts to protect and safeguard the world’s cultural and natural heritage | 11.4.1: Total expenditure (public and private) per capita spent on the preservation, protection and conservation of all cultural and natural heritage, by type of heritage (cultural, natural, mixed and World Heritage Centre designation), level of government (national, regional and local/municipal), type of expenditure (operating expenditure/investment) and type of private funding (donations in kind, private non-profit sector and sponsorship) | |
| 2.3: By 2030, double the agricultural productivity and incomes of small-scale food producers, in particular women, indigenous peoples, family farmers, pastoralists and fishers, including through secure and equal access to land, other productive resources and inputs, knowledge, financial services, markets and opportunities for value addition and non-farm employment | 2.3.1: Volume of production per labour unit by classes of farming/pastoral/forestry enterprise size | |
| 2.3.2: Average income of small-scale food producers, by sex and indigenous status | |
| 11.3: By 2030, enhance inclusive and sustainable urbanization and capacity for participatory, integrated and sustainable human settlement planning and management in all countries | 11.3.1: Ratio of land consumption rate to population growth rate | |
| 11.3.2:Proportion of cities with a direct participation structure of civil society in urban planning and management that operate regularly and democratically | |
| 13.1: Strengthen resilience and adaptive capacity to climate-related hazards and natural disasters in all countries | 13.1.2: Number of countries that adopt and implement national disaster risk reduction strategies in line with the Sendai Framework for Disaster Risk Reduction 2015-2030 | |
| 13.1.3: Proportion of local governments that adopt and implement local disaster risk reduction strategies in line with national disaster risk reduction strategies | |
| 7.3: By 2030, double the global rate of improvement in energy efficiency | 7.2.2: Energy intensity measured in terms of primary energy and GDP | |
